# Supplementary material for: Multi-functional neuroprotective activity of neohesperidin dihydrochalcone: a novel scaffold for Alzheimer's disease therapeutics identified via drug repurposing screening
Source: Royal Society of Chemistry journal article supplement (doi:10.1039/c8nj00853a), 2018-01-01
Supplement: c8nj00853a1.pdf [file c8nj00853a1.pdf]

**Supplementary material**

**Multi-functional Neuroprotective Activity of Neohesperidin Dihydrochalcone:**

**A novel scaffold for Alzheimer's disease Therapeutics identified via drug  
repurposing screen**

Sandipan Chakraborty<sup>†\*</sup>, Jyotirmoy Rakshit<sup>‡</sup>, Jaya Bandyopadhyay<sup>‡\*</sup>, and Soumalee Basu<sup>†\*</sup>

<sup>†</sup>Department of Microbiology, University of Calcutta, 35 Ballygunge Circular Road, Kolkata -  
700 019, India

<sup>‡</sup>Department of Biotechnology, Maulana Abul Kalam Azad University of Technology, West  
Bengal, BF-142, Salt Lake, Sector-1, Kolkata 700064, India

<sup>^</sup>*Present address:* Department of Physical Chemistry, Indian Association for the Cultivation of  
Science, Jadavpur, Kolkata-700032, West Bengal, India

\* Corresponding authors:

Soumalee Basu: Tel: +91-33-4615445/4711/4712 (Ext. 341/342); Fax: +91-33-24614849; E-  
mail: [soumalee@gmail.com](mailto:soumalee@gmail.com); Sandipan Chakraborty: [sandipanchakraborty.13@gmail.com](mailto:sandipanchakraborty.13@gmail.com); Jaya  
Bandyopadhyay: [jaya.bandyopadhyay@gmail.com](mailto:jaya.bandyopadhyay@gmail.com)

## Result and Discussion

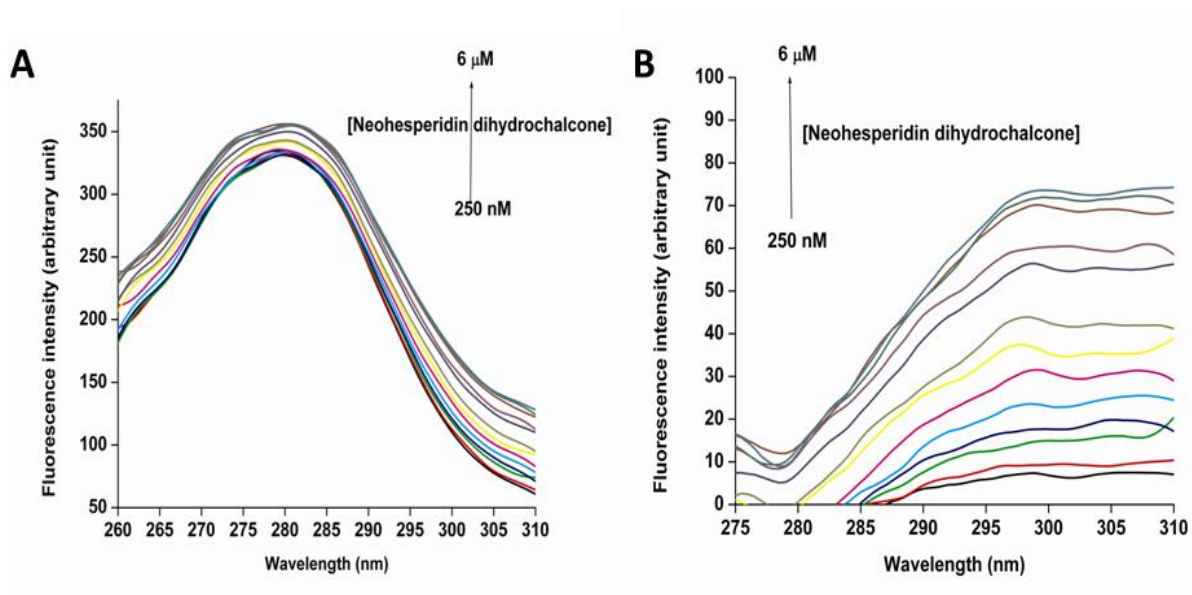

**Fig. S1:** **A:** Fluorescence excitation spectra of BACE1 ( $\lambda_{\text{em}} = 340 \text{ nm}$ ) upon gradual addition of neohesperidin dihydrochalcone. **B:** Excitation difference spectra obtained by subtracting the excitation spectrum of BACE1 from each excitation spectrum of BACE1-neohesperidin dihydrochalcone complexes.

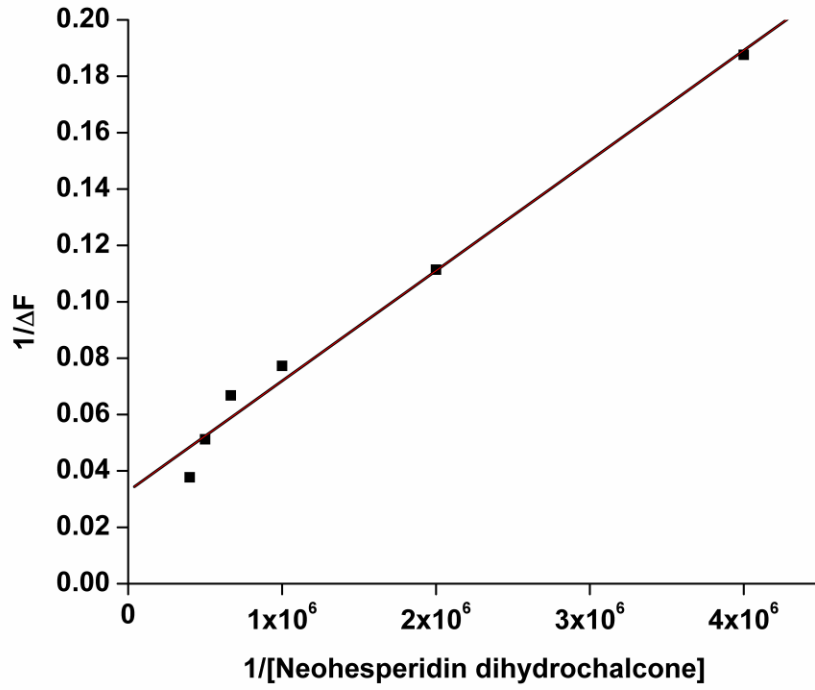

**Fig. S2:** Double reciprocal plot using fluorescence intensity data for neohesperidin dihydrochalcone binding to BACE1.

**Table S1:** List of compound and their predicted activities obtained from the *in silico* virtual screening of an in house developed dataset using the developed multi-target screening protocol

| Compound name                 | BACE1         |                                 | Anti-A $\beta$ activity         | Antioxidant activity (TEAC) |                    |
|-------------------------------|---------------|---------------------------------|---------------------------------|-----------------------------|--------------------|
|                               | Docking score | IC <sub>50</sub> predicted (nM) | IC <sub>50</sub> predicted (nM) | 5 parameter-model           | 4 parameter-model  |
| Hesperidin                    | -38.7363      | 1409.288798                     | 88.28765872                     | 0.688493747                 | 0.665732869        |
| Datiscin                      | -38.3346      | 12.46809205                     | 92.66164375                     | 0.657657837                 | 0.659781297        |
| Neohesperidin dihydrochalcone | <b>-36.67</b> | <b>248.141841</b>               | <b>77.94</b>                    | <b>0.556800992</b>          | <b>0.883486667</b> |
| Diosmin                       | -36.9216      | 288.8683761                     | 272.3955447                     | 0.723602402                 | 0.531251293        |
| D-(+)-Raffinose pentahydrate  | -36.7014      | 1548.460032                     | 0.37230597                      | 0.077196925                 | 0.143021062        |
| Didymin                       | -36.6885      | 239.607275                      | 4132.377612                     | 0.541127992                 | 0.586273143        |
| Peltatoside                   | -34.3517      | 1158.510569                     | 69.19902892                     | 0.718290297                 | 0.850942079        |
| Oleuropein                    | -34.1546      | 32.8700224                      | 2285.598803                     | 0.167455725                 | 0.203282503        |
| Isorhoifolin                  | -32.7672      | 0.309243087                     | 426.0886836                     | 0.412952405                 | 185.5666809        |
| Isorhamnetin-3-O-rutinoside   | -32.3747      | 261.0958687                     | 41.56234088                     | 0.637969623                 | 0.668036205        |
| Narirutin                     | -32.2794      | 113.3965913                     | 193.8652636                     | 0.617731859                 | 0.831955314        |
| Eriocitrin                    | -31.483       | 794.6941206                     | 62.21570117                     | 0.738244126                 | 0.698393197        |
| Flavanomarein                 | -31.1496      | 141.1887197                     | 225.4239212                     | 1.284990746                 | 1.138675562        |
| Rhoifolin                     | -29.9971      | 32.31469044                     | 977.0122297                     | 0.631102645                 | 0.743019138        |
| Maltotriose                   | -29.9517      | 573.9842822                     | 0.073012967                     | 0.069951978                 | 0.211836114        |
| Neoeriocitrin                 | -29.8783      | 9.16854E-06                     | 359.4181463                     | 0.692309036                 | 219.0786217        |
| Amygdalin                     | -29.6618      | 126.9404402                     | 841.7827077                     | 0.171159102                 | 0.759451423        |

|                                 |          |             |             |             |             |
|---------------------------------|----------|-------------|-------------|-------------|-------------|
| Sciadopitysin                   | -29.511  | 30.59849035 | 1336.903314 | 9.234215383 | 9.64050979  |
| Saponarin                       | -29.3091 | 6.504291551 | 362.4933135 | 0.664354682 | 0.80686337  |
| Neodiosmin                      | -29.1865 | 986.0524125 | 41.94691249 | 0.685488226 | 0.909703781 |
| Robinin                         | -29.1145 | 222.3821886 | 8.152672562 | 0.37471407  | 0.629796148 |
| Linarin                         | -28.7275 | 36.71977404 | 414.6675015 | 0.579161921 | 0.62936125  |
| Aristolochic acid               | -28.5487 | 6.144690317 | 335196.905  | 1.958393685 | 2.687818879 |
| Naringin                        | -28.11   | 267.4853494 | 203.1421291 | 0.607715062 | 0.823000312 |
| Luteolin-3',7-di-O-glucoside    | -27.0711 | 718.7866461 | 33.32728996 | 0.662216504 | 0.875386813 |
| Quercetin-3,4'-di-O-glucoside   | -27.0132 | 117.4356619 | 27.20194762 | 0.70291045  | 0.821296553 |
| Gentianose                      | -26.5373 | 3019.95172  | 0.222894832 | 0.07730365  | 0.157108615 |
| Fraxin                          | -25.9137 | 5.251701096 | 9556.524994 | 0.274852695 | 0.33581493  |
| Isorhamnetin-3-O-glucoside      | -25.8574 | 1474.347983 | 2087.372704 | 1.087176359 | 0.969616506 |
| Kaempferol-7-O-neohesperidoside | -25.8215 | 753.5290502 | 65.93256931 | 0.603253708 | 0.602004864 |
| Neohesperidin                   | -25.0251 | 45.25848374 | 44.76102262 | 0.663590256 | 0.768599327 |
| Psoromic acid                   | -24.7807 | 135.3630091 | 72694.23992 | 0.764891791 | 4.244240644 |
| Sissotrin                       | -24.7341 | 594.8397741 | 9543.331283 | 0.803526122 | 0.874580923 |
| Fortunellin                     | -24.5764 | 17.94733627 | 347.2961749 | 0.593745047 | 0.608975751 |
| Protohypericin                  | -24.4967 | 2702.713432 | 9.149555587 | 1301.667316 | 486.9675252 |
| Luteolin-4'-O-glucoside         | -24.3332 | 475.9923797 | 846.2525688 | 1.158510569 | 1.517399721 |
| Rutinose                        | -24.2496 | 3965.51868  | 3.025519804 | 0.108617549 | 0.13620718  |
| Aloin A                         | -23.8745 | 246.831169  | 543.2503315 | 1.534616983 | 0.712524825 |
| Lanatoside B                    | -23.7288 | 23.2434184  | 0.268720006 | 0.017615704 | 0.01680351  |

|                              |          |             |             |             |             |
|------------------------------|----------|-------------|-------------|-------------|-------------|
| Glycitin                     | -23.6008 | 839.0734899 | 2435.0058   | 0.834449387 | 0.806677605 |
| Syringetin-3-O-glucoside     | -23.4617 | 371.0222886 | 1374.041975 | 0.900326431 | 0.811708325 |
| Ononin                       | -23.3663 | 739.0945503 | 6486.344335 | 0.809282222 | 0.954552897 |
| 4-deoxyphloridzin            | -23.3084 | 253.1628639 | 780.3689842 | 1.183041556 | 0.764539626 |
| Piperine                     | -23.0781 | 4544.645372 | 11122438.17 | 0.181886305 | 0.153497038 |
| Icariin                      | -22.6963 | 516.2974737 | 218.6250894 | 0.563637656 | 0.381944271 |
| 4',6,7-trihydroxy isoflavone | -22.3716 | 28608.82361 | 1158.510569 | 1.461503972 | 2.173201519 |
| Glycocholic acid             | -22.0943 | 734.0066592 | 0.004879777 | 0.067951649 | 316227766   |
| Lariciresinol                | -22.0722 | 175.5092458 | 4134.28108  | 0.883893622 | 0.922783882 |
| Kaempferol-3-O-glucoside     | -21.8926 | 172.0679561 | 1029.674601 | 1.091440336 | 1.413513628 |
| Ursodeoxycholic acid         | -21.5457 | 4830.58802  | 3.15427824  | 0.064002951 | 0.007259388 |
| Poncirin                     | -21.1663 | 64.44659847 | 594.2921586 | 0.568591025 | 0.700809532 |
| Tectorigenin                 | -21.0812 | 2652.772459 | 46762.74537 | 1.14182619  | 1.397655056 |
| D-melibiose                  | -20.9825 | 5432.503315 | 0.263997613 | 0.113579512 | 0.187283708 |
| Puerarin                     | -20.8924 | 833.6811846 | 5114.462516 | 1.249683397 | 0.74954895  |
| Ajmalicine                   | -20.8658 | 3793.14985  | 26662.44668 | 0.206395393 | 0.062632536 |
| Beta-Boswellic acid          | -20.8212 | 184.5015419 | 6.077150616 | 0.053789809 | 0.004759924 |
| Sennidine A                  | -20.761  | 11324.00363 | 3.37442671  | 12.15346179 | 18.97142704 |
| Baicalein                    | -20.7146 | 875.7900363 | 5153.47294  | 1.320383231 | 1.867669386 |
| Helicin                      | -20.6092 | 623.1606189 | 3966.431879 | 0.357519719 | 0.525412015 |
| D-(-)-salicin                | -20.4627 | 1108.919448 | 37748.52617 | 0.405041945 | 0.637382301 |
| Carnosol                     | -20.354  | 146.5885335 | 2379.030446 | 0.223975235 | 0.061305579 |
| Chitobiose                   | -20.3434 | 169.6680232 | 451.3360253 | 0.077037113 | 0.061503524 |

|                             |          |             |             |             |             |
|-----------------------------|----------|-------------|-------------|-------------|-------------|
| Trehalose                   | -20.2298 | 3184.197522 | 0.558984802 | 0.141123715 | 0.13743584  |
| Chenodeoxycholic acid       | -20.1691 | 4584.584692 | 1.097488555 | 0.064714262 | 0.007407983 |
| Digitoxigenin               | -19.8806 | 109.6983259 | 29.63466349 | 0.052856694 | 0.006886523 |
| Matairesinol                | -19.8008 | 62.54606617 | 9490.738339 | 0.785416463 | 0.52589616  |
| Verbenaline                 | -19.4418 | 2881.376435 | 4716.284553 | 0.067421747 | 0.041001524 |
| Stachyose                   | -19.2823 | 315.3552025 | 0.043611397 | 0.045782552 | 0.191249364 |
| Alpha-Sophorose             | -19.1636 | 381.9442708 | 0.644614396 | 0.132525667 | 0.173141031 |
| Demissidine                 | -18.7496 | 773.7488205 | 3.347341331 | 0.058979352 | 0.008707631 |
| Isomaltose                  | -18.4698 | 573.3238387 | 27.88688463 | 0.134865231 | 0.227300295 |
| Prunetin                    | -18.43   | 798.7300061 | 12894.3662  | 1.061695557 | 1.099765268 |
| Proscillaridin A            | -18.3991 | 26.21199039 | 104.2317429 | 0.045582695 | 0.011225353 |
| D-(+)-saccharose            | -18.3894 | 4258.925077 | 1.521948651 | 0.132892356 | 0.161733506 |
| 5,6-benzoflavone            | -18.3512 | 812.6433766 | 4391.36969  | 2.917427014 | 2.09652478  |
| L-(-)-mannose               | -18.3297 | 20225.53415 | 1039.441375 | 0.365342335 | 0.202162221 |
| Corynanthine                | -18.2705 | 1716.326863 | 13255.61861 | 0.211494949 | 0.073198132 |
| Beta-Gentiobiose            | -18.2689 | 57.70321353 | 10.48576209 | 0.128765643 | 0.19155787  |
| Deoxycorticosterone acetate | -18.066  | 66.81900434 | 175.0652708 | 0.053629037 | 0.005516962 |
| Aucubin                     | -17.9236 | 396.4605691 | 732.8245331 | 0.106757895 | 0.169824365 |
| Inulin                      | -17.8985 | 61.67369945 | 0.453941617 | 0.043521114 | 0.09191788  |
| Cinchonidine                | -17.7837 | 59.93768983 | 14315.28504 | 0.230303215 | 0.11529222  |
| Cucurbitacin I              | -17.6236 | 343.9537114 | 404.3896205 | 0.079634269 | 0.032374271 |
| Apomorphine                 | -17.4423 | 12022.64435 | 8532.965702 | 1.21338885  | 0.359749335 |
| 7,8-benzoflavone            | -17.2833 | 545.7578611 | 7.989139417 | 2.70520387  | 3522086356  |
| Lactulose                   | -17.2521 | 453.6281532 | 27.27093323 | 0.121478662 | 0.189321528 |

|                     |          |             |             |             |             |
|---------------------|----------|-------------|-------------|-------------|-------------|
| Ethyl-rhoeagenine   | -17.0891 | 1921.321311 | 4620617.302 | 0.532966608 | 2.558585887 |
| Cucurbitacin E      | -17.0392 | 123.2537098 | 1022.556939 | 0.06007586  | 0.031666495 |
| Beta-ecdysone       | -16.9404 | 362.9108896 | 3.224036872 | 0.094406088 | 0.012708667 |
| Digoxin             | -16.7083 | 50.48937562 | 1.040159644 | 0.029586937 | 0.01008556  |
| Myristicin aldehyde | -16.6419 | 1328.311706 | 1073989412  | 0.222792209 | 1.375308097 |
| Gitoxin             | -16.5613 | 0.189190794 | 1.532145465 | 0.033158891 | 0.010430377 |
| Homatropine         | -16.2942 | 1283.80777  | 51963.69201 | 0.172822387 | 0.048050731 |
| Protopine           | -16.1931 | 3543.235349 | 6947043.207 | 0.647142616 | 0.996974844 |
| DI-laudanosine      | -15.7198 | 2009.092813 | 658415.4299 | 0.618728328 | 0.667728633 |
| Myricanol           | -15.693  | 2235.115653 | 2025.349607 | 1.108664139 | 0.611223439 |
| 5-methoxyflavanone  | -15.6884 | 3518.033738 | 88920.11179 | 0.660085207 | 0.59319844  |
| Vialinin A          | -15.653  | 3235.936569 | 323.4446709 | 30.95993213 | 49.00044228 |
| Andrographolide     | -15.5857 | 503.6165574 | 513.4521775 | 0.0575705   | 0.010678248 |
| Karanjin            | -15.5574 | 2259.956084 | 23211.32861 | 0.6475898   | 0.905315592 |
| Celastrol           | -15.5104 | 2045.97348  | 202.348505  | 0.225060873 | 0.052966344 |
| Bromolaudonosin     | -15.5047 | 3397.817118 | 7103951.7   | 0.565457541 | 1.256897898 |
| Ajmaline            | -15.4643 | 4895.533198 | 887.7690494 | 0.272082118 | 0.119426306 |
| Flavan-3-ol         | -15.4297 | 2453.578741 | 981.0336406 | 0.819218969 | 0.997232216 |
| Lithocholic acid    | -15.396  | 2194.320195 | 2.257875546 | 0.06060382  | 0.006002055 |
| Ipriflavone         | -15.3924 | 371.5352291 | 220902.1791 | 0.661911612 | 0.416965382 |
| Cytisine            | -15.2061 | 11622.51191 | 2244915.508 | 0.081021448 | 0.023453086 |
| Rotenone            | -15.0891 | 2475.711306 | 7542233.958 | 0.61687902  | 0.578895269 |
| Oleocanthal         | -14.9403 | 359.6665093 | 414572.0318 | 0.247001733 | 0.281643673 |
| Neoruscogenin       | -14.9027 | 10594.97655 | 84.97672708 | 0.055834162 | 0.035131768 |
| L-hyoscyamine       | -14.7354 | 1061.695557 | 81564.27871 | 0.222535858 | 0.056780603 |



|                                         |          |             |             |             |             |
|-----------------------------------------|----------|-------------|-------------|-------------|-------------|
| Cellobiose                              | -14.7282 | 10141.44874 | 6.270468637 | 0.145948622 | 0.187845156 |
| Ginkgolide A                            | -14.6433 | 170.4119319 | 335.505775  | 0.02131572  | 0.054726793 |
| Diosgenin                               | -14.5171 | 399.5765566 | 18.92343619 | 0.055169621 | 0.023993853 |
| Harmaline                               | -14.4865 | 4870.796665 | 576235.4864 | 0.219533095 | 0.474569693 |
| Pilocarpine                             | -14.4662 | 54.03809121 | 473260.2186 | 0.051003502 | 0.031088517 |
| Cucurbitacin D                          | -14.3841 | 17.72148045 | 112.8236122 | 0.082451773 | 0.028536454 |
| Ginkgolide B                            | -14.2578 | 82.20533434 | 340.251462  | 0.020691882 | 0.068580398 |
| Cymarol                                 | -14.1704 | 1.953439656 | 40.30881213 | 0.043954162 | 0.021777098 |
| Alpha-ecdysone                          | -14.1475 | 71.17049723 | 7.001643594 | 0.08731724  | 0.011651987 |
| Abietic acid                            | -14.0298 | 1242.224241 | 470.6520991 | 0.051156403 | 0.012246162 |
| Hypophyllantin                          | -13.9385 | 2274.573631 | 618585.8765 | 0.608135001 | 1.406047524 |
| Sparteine                               | -13.807  | 67390.70504 | 8.258477692 | 0.055118831 | 1.53391E-05 |
| Cytochalasin                            | -13.6931 | 332.2002845 | 17108.02988 | 0.16931678  | 0.050933087 |
| Cymarol                                 | -13.288  | 5.869485039 | 9.552125065 | 0.045196    | 0.010036909 |
| Marrubiin                               | -13.1813 | 15.85988376 | 177.9098527 | 0.062230029 | 0.015527445 |
| Guggulsterone E                         | -13.0869 | 77464.01448 | 3697.430335 | 0.068754321 | 0.015801561 |
| Isoflavan                               | -13.0251 | 6918.309709 | 1237.656138 | 0.646844664 | 0.939723311 |
| Seneciophyllin                          | -12.8609 | 6423.918168 | 1008091.609 | 0.05098002  | 0.04995742  |
| Parthenolide                            | -12.7032 | 220.4448716 | 107225.974  | 0.035156044 | 0.014972696 |
| Eburnamonine                            | -12.6344 | 5833.107765 | 22898.12912 | 0.220495637 | 0.087236855 |
| 18-alpha-Glycyrrhetic acid methyl ester | -12.6329 | 19.72422736 | 30.8318795  | 0.051594095 | 0.008990834 |
| Elemolic acid                           | -12.5566 | 2096.52478  | 41.20975191 | 0.051736852 | 0.008588157 |
| Guggulsterone Z                         | -12.4091 | 88267.33207 | 1425.607594 | 0.06948643  | 0.01619571  |
| Beta-Amyrin acetate                     | -11.9193 | 138.5798223 | 54.38761317 | 0.038841858 | 0.004111497 |

|                            |          |             |             |             |             |
|----------------------------|----------|-------------|-------------|-------------|-------------|
| Alpha-Boswellic acid       | -11.8618 | 971.4042517 | 7.46276902  | 0.05365374  | 0.00480618  |
| Conessin                   | -11.8403 | 39454.81397 | 26.74853494 | 0.052323887 | 1.29211E-05 |
| Phyllantine                | -11.7172 | 450.4016782 | 388508.0304 | 0.564286941 | 0.644762841 |
| Sarsapogenine              | -11.4613 | 514.5173214 | 2.284546489 | 0.052601727 | 0.021032941 |
| Ginkgolide C               | -11.455  | 58.04970272 | 279.5117054 | 0.021517906 | 0.079250133 |
| Alpha-Acetylboswellic acid | -11.1469 | 145.0774789 | 36.04126286 | 0.040888389 | 0.006277692 |
| Guaiol                     | -11.1071 | 1290.921994 | 8.731724006 | 0.064239182 | 0.011835865 |
| Betulin diacetate          | -10.9823 | 2715.18859  | 739.9459543 | 0.03353513  | 0.00686594  |
| Cedrol                     | -10.7859 | 1208.370182 | 0.336511569 | 0.070339617 | 0.009490738 |
| Lupeol acetate             | -10.1884 | 2224.333998 | 91.0122812  | 0.039856577 | 0.00496478  |
| Tomatidine                 | -10.1825 | 1384.203682 | 3.037386092 | 0.059648565 | 0.019966411 |
| Sclareol                   | -9.9749  | 6103.795856 | 11.88775922 | 0.065871871 | 0.011468325 |
| Caulophyllogenin           | -9.3954  | 1037.528416 | 2.712688961 | 0.065569217 | 0.008943345 |
| Friedelin                  | -9.3814  | 16904.40932 | 3.964605691 | 0.052227592 | 0.005661089 |
| Nootkatone                 | -9.3146  | 73451.38682 | 493.6282431 | 0.061773186 | 0.010730007 |
| Alpha-Pineneoxide          | -9.0677  | 16630.2968  | 13.80384265 | 0.048741625 | 0.02748527  |
| Dihydrocarveol             | -8.7013  | 2351.79791  | 20516.34531 | 0.072193816 | 0.013819744 |
| Norcamphor                 | -8.3612  | 3291546.539 | 90.55240723 | 0.084664237 | 0.022898129 |
| Lanatoside C               | -8.338   | 93.90743969 | 0.341743293 | 0.017901936 | 0.019801587 |
| Lupeol                     | -7.9729  | 609.2562597 | 3.464974158 | 0.053174082 | 0.008717661 |
| Isobornyl acetate          | -7.7658  | 1857.376729 | 699.5197811 | 0.044575888 | 0.010894317 |
| Betulinic acid             | -7.4054  | 9538.937428 | 12.34241088 | 0.050815944 | 0.007282827 |
| Beta-acetyl boswellic acid | -7.3869  | 897.8421709 | 16.74942876 | 0.040234629 | 0.008348338 |
| Sabinyol acetate           | -7.2868  | 1936.421964 | 20878.53395 | 0.042884465 | 0.019164611 |

|                                        |         |             |             |             |             |
|----------------------------------------|---------|-------------|-------------|-------------|-------------|
| Lupenone                               | -7.0419 | 12820.35349 | 24.13237137 | 0.05041967  | 0.007256046 |
| Beta-Amyrin                            | -6.872  | 480.8393484 | 3.045790305 | 0.052432432 | 0.008822669 |
| Neohesperidose heptaacetate            | -6.5921 | 0.304649171 | 222997503   | 0.008064919 | 0.143946132 |
| Cholesterol                            | -6.1286 | 724.1024218 | 9.418895965 | 0.057782989 | 0.00865765  |
| Cholesteryl acetate                    | -5.7565 | 187.7586699 | 275.4228703 | 0.039636929 | 0.004345102 |
| Eucalyptol                             | -5.4435 | 5592.42283  | 7.954263981 | 0.057956213 | 0.01437474  |
| Cycloartenol                           | -5.1056 | 665.2731562 | 8.478128603 | 0.05332121  | 0.009711806 |
| Terpinyl acetate                       | -5.0934 | 1645.129159 | 12433.68899 | 0.045561708 | 0.013567505 |
| Fucosterol                             | -4.6058 | 675.7716994 | 17.45420209 | 0.05322308  | 0.009808441 |
| Ergosterol                             | -4.421  | 752.6620171 | 119.4263062 | 0.05310067  | 0.012336728 |
| Betulinic acid methyl ester            | -4.364  | 758.9269934 | 30.30400298 | 0.048250298 | 0.007158137 |
| Beta-sitosterol                        | -4.2923 | 756.1361471 | 5.995149258 | 0.054550659 | 0.008163944 |
| Stigmasterol                           | -3.7098 | 711.8688673 | 19.95721794 | 0.056272991 | 0.009910601 |
| Betulin                                | -3.5559 | 864.1716206 | 2.534544963 | 0.055131524 | 0.010308607 |
| Cycloartenol acetate                   | -1.3934 | 198.2896289 | 130.5870166 | 0.039165169 | 0.004520641 |
| 18-beta-Glycyrrhetic acid methylester  | N.D.    | 15.41700453 | 38.87764949 | 0.05514422  | 0.009942601 |
| 11-keto-beta-Boswellic acid            | N.D.    | 150.3834348 | 5.468900223 | 0.062115502 | 0.007512768 |
| D-(+)-Raffinose undecaacetate          | N.D.    | 151.2167849 | 48528.85002 | 0.014371431 | 0.072727725 |
| Ursolic acid methylester               | N.D.    | 453.6281532 | 33.64340936 | 0.04995742  | 0.007640117 |
| 3-O-Acetyl-11-keto-beta-Boswellic acid | N.D.    | 610.6607405 | 28.106062   | 0.040926066 | 0.012122718 |
| Oleanolic acid                         | N.D.    | 679.672972  | 28.79386738 | 0.049283325 | 0.00793049  |

|                            |      |             |             |             |             |
|----------------------------|------|-------------|-------------|-------------|-------------|
| methyl ester               |      |             |             |             |             |
| Alpha-Amyrin               | N.D. | 710.2316143 | 3.318180448 | 0.054865583 | 0.008336812 |
| Boswellic acid alpha       | N.D. | 971.4042517 | 7.46276902  | 0.05365374  | 0.00480618  |
| Erythrodiol                | N.D. | 1166.003892 | 1.562068231 | 0.05900652  | 0.010406388 |
| 18-beta-Glycyrrhetic acid  | N.D. | 1242.796438 | 7.032342269 | 0.060283714 | 0.009908319 |
| Uvaol                      | N.D. | 1358.000719 | 2.398280631 | 0.062215701 | 0.01081185  |
| Echinocystic acid          | N.D. | 1793.081377 | 3.907509117 | 0.059142544 | 0.008384941 |
| 18-alpha-Glycyrrhetic acid | N.D. | 1896.705921 | 45.16479049 | 0.057623549 | 0.014750271 |
| Calestrol                  | N.D. | 2045.97348  | 202.348505  | 0.225060873 | 0.052966344 |
| Asiatic acid               | N.D. | 4060.691534 | 1.432847598 | 0.067842212 | 0.010029978 |
| Ursolic acid               | N.D. | 4080.374267 | 11.74627056 | 0.051558467 | 0.007751754 |
| Hypericin                  | N.D. | 5349.337509 | 3.738522511 | 381.0658234 | 152.6159766 |
| D-melezitose               | N.D. | 5432.503315 | 0.263997613 | 0.113579512 | 0.187283708 |
| Hederagenin                | N.D. | 6429.837541 | 4.048554594 | 0.060939656 | 0.008912509 |
| Oleanolic acid             | N.D. | 8877.690494 | 3.3954708   | 0.053826978 | 0.008033411 |
| Cholesteryl chloride       | N.D. | 343162.6398 | 45.77201167 | 0.041638972 | 1.75509E-05 |
| Alpha-Humulene             | N.D. | 10384844.55 | 155.2029601 | 0.048061796 | 1.28351E-05 |
| (-)-Trans caryophyllene    | N.D. | 10468874.66 | 192.9301047 | 0.047446043 | 1.37499E-05 |
| Beta-Cedrene               | N.D. | 11122438.17 | 13.32293779 | 0.048551204 | 1.03062E-05 |
| Camphene                   | N.D. | 12820353.49 | 20.8257188  | 0.049934419 | 1.27761E-05 |
| Alpha-Cedrene              | N.D. | 13430741.8  | 4.8674332   | 0.048696753 | 9.38642E-06 |
| Ledene                     | N.D. | 13598781.63 | 39.70086781 | 0.049842521 | 1.15239E-05 |

**N.D.- Not docked**
